# Supplementary material
Source: publisher site journal article supplement (https://www.dovepress.com/article/352410)
Supplement: Supplementary file 1 [file get_supplementary_file.php]

**Supplementary Data 1: Refractive & visual acuity outcome of stage 1 + preoperative refractive & visual acuity data**  
**Stage 1: grouped by ORA / MRC // group A: ORA / MRC = 1 or less (= low ORA) / group B: ORA / MRC = 1.1 and more (= high ORA)**

Table 1: Stage 1

| Variable             | Low ORA (Not Matched) |       |       |       |      |        |       |       | High ORA (Not Matched) |       |       |       |      |        |       |       | P-Value |
|----------------------|-----------------------|-------|-------|-------|------|--------|-------|-------|------------------------|-------|-------|-------|------|--------|-------|-------|---------|
|                      | N                     | Min   | Max   | Mean  | SD   | Median | Q25   | Q75   | N                      | Min   | Max   | Mean  | SD   | Median | Q25   | Q75   |         |
| <b>Preoperative</b>  |                       |       |       |       |      |        |       |       |                        |       |       |       |      |        |       |       |         |
| K Mean               | 609                   | 39.50 | 48.10 | 43.90 | 1.46 | 43.90  | 42.90 | 44.90 | 171                    | 39.10 | 49.30 | 43.80 | 1.57 | 43.70  | 42.70 | 44.85 | 0.439*  |
| K Cyl                | 609                   | -4.10 | -0.10 | -1.44 | 0.74 | -1.30  | -1.80 | -0.90 | 171                    | -3.60 | 0.00  | -1.10 | 0.68 | -1.00  | -1.60 | -0.55 | <0.001† |
| Sphere               | 609                   | -8.00 | -0.25 | -3.47 | 2.00 | -3.25  | -5.00 | -1.75 | 171                    | -8.00 | -0.25 | -3.45 | 1.86 | -3.25  | -4.62 | -2.00 | 0.990†  |
| Cylinder             | 609                   | -4.00 | -0.75 | -1.43 | 0.70 | -1.25  | -1.75 | -1.00 | 171                    | -1.75 | -0.75 | -0.88 | 0.21 | -0.75  | -1.00 | -0.75 | <0.001† |
| SE                   | 609                   | -9.12 | -0.75 | -4.19 | 1.97 | -4.00  | -5.62 | -2.62 | 171                    | -8.38 | -0.62 | -3.89 | 1.86 | -3.75  | -5.00 | -2.38 | 0.100†  |
| UDVA                 | 607                   | 0.00  | 0.80  | 0.10  | 0.14 | 0.05   | 0.01  | 0.10  | 169                    | 0.00  | 0.78  | 0.11  | 0.16 | 0.05   | 0.01  | 0.10  | 0.987†  |
| CDVA                 | 609                   | 0.80  | 1.53  | 1.04  | 0.12 | 1.00   | 0.96  | 1.15  | 171                    | 0.80  | 1.39  | 1.03  | 0.12 | 1.00   | 0.96  | 1.15  | 0.621†  |
| ORA                  | 609                   | 0.03  | 1.91  | 0.63  | 0.34 | 0.58   | 0.38  | 0.82  | 171                    | 0.75  | 2.00  | 1.18  | 0.31 | 1.12   | 0.95  | 1.33  | <0.001† |
| ORA MRC              | 609                   | 0.03  | 1.00  | 0.48  | 0.25 | 0.45   | 0.28  | 0.67  | 171                    | 1.00  | 2.60  | 1.35  | 0.33 | 1.26   | 1.09  | 1.55  | <0.001† |
| <b>Postoperative</b> |                       |       |       |       |      |        |       |       |                        |       |       |       |      |        |       |       |         |
| K Mean               | 609                   | 34.40 | 44.90 | 40.38 | 1.99 | 40.50  | 39.10 | 41.90 | 171                    | 36.10 | 45.60 | 40.61 | 1.96 | 40.70  | 39.50 | 41.80 | 0.259†  |
| K Cyl                | 609                   | -3.50 | 0.00  | -0.82 | 0.46 | -0.70  | -1.10 | -0.50 | 171                    | -6.10 | 0.00  | -1.18 | 0.61 | -1.10  | -1.40 | -0.90 | <0.001† |
| Sphere               | 609                   | -1.50 | 2.25  | 0.25  | 0.49 | 0.25   | 0.00  | 0.50  | 171                    | -1.00 | 2.25  | 0.20  | 0.47 | 0.25   | 0.00  | 0.50  | 0.226†  |
| Cylinder             | 609                   | -2.00 | 0.00  | -0.39 | 0.36 | -0.25  | -0.50 | 0.00  | 171                    | -1.75 | 0.00  | -0.41 | 0.36 | -0.25  | -0.50 | -0.25 | 0.483†  |
| SE                   | 609                   | -1.75 | 1.62  | 0.05  | 0.43 | 0.00   | -0.25 | 0.25  | 171                    | -1.12 | 1.62  | 0.00  | 0.41 | 0.00   | -0.25 | 0.25  | 0.057†  |
| UDVA                 | 609                   | 0.00  | 1.60  | 1.01  | 0.20 | 1.00   | 0.92  | 1.15  | 171                    | 0.00  | 1.53  | 1.01  | 0.20 | 1.00   | 0.90  | 1.15  | 0.752†  |
| CDVA                 | 609                   | 0.00  | 1.60  | 1.08  | 0.16 | 1.10   | 1.00  | 1.20  | 171                    | 0.00  | 1.60  | 1.07  | 0.19 | 1.00   | 1.00  | 1.20  | 0.835†  |
| ORA                  | 609                   | 0.00  | 2.50  | 0.70  | 0.38 | 0.66   | 0.42  | 0.90  | 171                    | 0.05  | 5.94  | 0.93  | 0.56 | 0.90   | 0.61  | 1.12  | <0.001† |
| EI                   | 609                   | 0.00  | 1.40  | 0.98  | 0.18 | 1.00   | 0.90  | 1.07  | 171                    | 0.00  | 1.53  | 0.98  | 0.19 | 1.00   | 0.89  | 1.09  | 0.876†  |
| SI                   | 609                   | 0.00  | 1.50  | 1.05  | 0.15 | 1.02   | 1.00  | 1.12  | 171                    | 0.00  | 1.60  | 1.04  | 0.17 | 1.02   | 1.00  | 1.11  | 0.796†  |

\* Independent T-Test.

† Mann-Whitney Test.

**Supplementary Data 2: Refractive & visual acuity outcome of stage 2 + preoperative refractive & visual acuity data**  
**Stage 2: grouped by ORA / MRC, matched for MRC / group A: ORA / MRC = 1 or less (= low ORA) / group B: ORA / MRC = 1.1 and more (= high ORA)**

Table 3: Stage 2

| Variable             | Low ORA (Matched) |       |       |       |      |        |       |       | High ORA (Matched) |       |       |       |      |        |       |       | P-Value             |
|----------------------|-------------------|-------|-------|-------|------|--------|-------|-------|--------------------|-------|-------|-------|------|--------|-------|-------|---------------------|
|                      | N                 | Min   | Max   | Mean  | SD   | Median | Q25   | Q75   | N                  | Min   | Max   | Mean  | SD   | Median | Q25   | Q75   |                     |
| <b>Preoperative</b>  |                   |       |       |       |      |        |       |       |                    |       |       |       |      |        |       |       |                     |
| K Mean               | 138               | 39.50 | 47.40 | 43.71 | 1.56 | 43.70  | 42.62 | 44.80 | 138                | 39.10 | 49.30 | 43.80 | 1.58 | 43.55  | 42.70 | 44.70 | 0.988 <sup>†</sup>  |
| K Cyl                | 138               | -2.10 | -0.20 | -1.06 | 0.39 | -1.10  | -1.30 | -0.80 | 138                | -3.60 | 0.00  | -1.10 | 0.69 | -1.00  | -1.67 | -0.60 | 0.954 <sup>†</sup>  |
| Sphere               | 138               | -8.00 | -0.25 | -3.53 | 1.90 | -3.25  | -4.75 | -2.00 | 138                | -8.00 | -0.25 | -3.53 | 1.90 | -3.25  | -4.75 | -2.00 | 1.000 <sup>†</sup>  |
| Cylinder             | 138               | -1.75 | -0.75 | -0.89 | 0.19 | -0.75  | -1.00 | -0.75 | 138                | -1.75 | -0.75 | -0.89 | 0.19 | -0.75  | -1.00 | -0.75 | 1.000 <sup>†</sup>  |
| SE                   | 138               | -8.38 | -0.75 | -3.97 | 1.89 | -3.75  | -5.25 | -2.41 | 138                | -8.38 | -0.75 | -3.97 | 1.89 | -3.75  | -5.25 | -2.41 | 1.000 <sup>†</sup>  |
| UDVA                 | 138               | 0.00  | 0.70  | 0.10  | 0.12 | 0.05   | 0.01  | 0.16  | 136                | 0.00  | 0.78  | 0.10  | 0.15 | 0.05   | 0.01  | 0.10  | 0.364 <sup>†</sup>  |
| CDVA                 | 138               | 0.80  | 1.46  | 1.08  | 0.13 | 1.05   | 1.00  | 1.20  | 138                | 0.80  | 1.32  | 1.03  | 0.12 | 1.00   | 0.96  | 1.10  | 0.002 <sup>†</sup>  |
| ORA                  | 138               | 0.03  | 1.02  | 0.49  | 0.23 | 0.49   | 0.32  | 0.65  | 138                | 0.75  | 2.00  | 1.17  | 0.30 | 1.12   | 0.98  | 1.30  | <0.001 <sup>†</sup> |
| ORA MRC              | 138               | 0.03  | 0.99  | 0.56  | 0.25 | 0.57   | 0.34  | 0.79  | 138                | 1.00  | 2.60  | 1.34  | 0.33 | 1.24   | 1.07  | 1.55  | <0.001 <sup>†</sup> |
| <b>Postoperative</b> |                   |       |       |       |      |        |       |       |                    |       |       |       |      |        |       |       |                     |
| K Mean               | 138               | 34.40 | 44.60 | 40.34 | 2.16 | 40.60  | 38.70 | 42.00 | 138                | 36.10 | 45.60 | 40.51 | 1.97 | 40.60  | 39.39 | 41.60 | 0.875 <sup>†</sup>  |
| K Cyl                | 138               | -1.60 | -0.10 | -0.69 | 0.33 | -0.70  | -0.90 | -0.40 | 138                | -6.10 | 0.00  | -1.17 | 0.63 | -1.10  | -1.40 | -0.90 | <0.001 <sup>†</sup> |
| Sphere               | 138               | -0.50 | 1.50  | 0.19  | 0.43 | 0.25   | 0.00  | 0.50  | 138                | -1.00 | 2.25  | 0.22  | 0.49 | 0.25   | 0.00  | 0.50  | 0.611 <sup>†</sup>  |
| Cylinder             | 138               | -1.25 | 0.00  | -0.34 | 0.30 | -0.25  | -0.50 | 0.00  | 138                | -1.50 | 0.00  | -0.41 | 0.35 | -0.25  | -0.50 | -0.25 | 0.121 <sup>†</sup>  |
| SE                   | 138               | -1.12 | 1.38  | 0.02  | 0.40 | 0.00   | -0.25 | 0.25  | 138                | -1.12 | 1.62  | 0.02  | 0.43 | 0.00   | -0.25 | 0.25  | 0.750 <sup>†</sup>  |
| UDVA                 | 138               | 0.00  | 1.60  | 1.04  | 0.20 | 1.05   | 0.96  | 1.15  | 138                | 0.00  | 1.53  | 1.00  | 0.21 | 1.00   | 0.90  | 1.15  | 0.020 <sup>†</sup>  |
| CDVA                 | 138               | 0.00  | 1.60  | 1.11  | 0.19 | 1.10   | 1.00  | 1.20  | 138                | 0.00  | 1.60  | 1.06  | 0.20 | 1.00   | 0.98  | 1.20  | 0.009 <sup>†</sup>  |
| ORA                  | 138               | 0.06  | 1.82  | 0.62  | 0.31 | 0.60   | 0.40  | 0.80  | 138                | 0.05  | 5.94  | 0.93  | 0.59 | 0.89   | 0.63  | 1.20  | <0.001 <sup>†</sup> |
| EI                   | 138               | 0.00  | 1.33  | 0.97  | 0.18 | 1.00   | 0.90  | 1.05  | 138                | 0.00  | 1.53  | 0.97  | 0.19 | 1.00   | 0.88  | 1.09  | 0.845 <sup>†</sup>  |
| SI                   | 138               | 0.00  | 1.39  | 1.04  | 0.17 | 1.00   | 1.00  | 1.11  | 138                | 0.00  | 1.60  | 1.03  | 0.18 | 1.02   | 1.00  | 1.11  | 0.941 <sup>†</sup>  |

\* Independent T-Test.

† Mann-Whitney Test.

**Supplementary Data 3: Refractive & visual acuity outcome of stage 3 + preoperative refractive & visual acuity data**  
**Stage 3: Grouped by ORA magnitude, matched for MRC // group A: ORA = 0.49 and less (= low ORA) /**  
**group B: ORA = 0.50 to 1.24 (= medium ORA) / group C: ORA = 1.25 and more (= high ORA)**

Table 5: Stage 3 (Matched)

|                           | Group    | N  | Min   | Max   | Mean  | SD   | Median | Q25   | Q75   |
|---------------------------|----------|----|-------|-------|-------|------|--------|-------|-------|
| <b>Preoperative</b>       |          |    |       |       |       |      |        |       |       |
| K Mean<br>P-Value=0.624   | Low      | 38 | 40.20 | 46.50 | 43.70 | 1.68 | 43.90  | 42.50 | 44.72 |
|                           | Moderate | 38 | 39.50 | 47.90 | 43.65 | 1.63 | 43.40  | 42.60 | 44.65 |
|                           | High     | 38 | 40.70 | 49.30 | 44.02 | 1.67 | 43.90  | 42.80 | 44.92 |
| K Cyl<br>P-Value=0.254    | Low      | 38 | -2.20 | -0.50 | -1.14 | 0.37 | -1.20  | -1.37 | -0.90 |
|                           | Moderate | 38 | -3.00 | -0.40 | -1.37 | 0.57 | -1.40  | -1.70 | -1.00 |
|                           | High     | 38 | -3.60 | -0.40 | -1.33 | 0.84 | -1.00  | -1.98 | -0.62 |
| Sphere<br>P-Value=1.000   | Low      | 38 | -8.00 | -0.50 | -3.24 | 1.92 | -3.12  | -4.00 | -1.50 |
|                           | Moderate | 38 | -8.00 | -0.50 | -3.24 | 1.92 | -3.12  | -4.00 | -1.50 |
|                           | High     | 38 | -8.00 | -0.50 | -3.24 | 1.92 | -3.12  | -4.00 | -1.50 |
| Cylinder<br>P-Value=1.000 | Low      | 38 | -2.25 | -0.75 | -1.05 | 0.36 | -1.00  | -1.19 | -0.75 |
|                           | Moderate | 38 | -2.25 | -0.75 | -1.05 | 0.36 | -1.00  | -1.19 | -0.75 |
|                           | High     | 38 | -2.25 | -0.75 | -1.05 | 0.36 | -1.00  | -1.19 | -0.75 |
| SE<br>P-Value=1.000       | Low      | 38 | -8.38 | -1.25 | -3.77 | 1.89 | -3.56  | -4.78 | -2.12 |
|                           | Moderate | 38 | -8.38 | -1.25 | -3.77 | 1.89 | -3.56  | -4.78 | -2.12 |
|                           | High     | 38 | -8.38 | -1.25 | -3.77 | 1.89 | -3.56  | -4.78 | -2.12 |
| UDVA<br>P-Value=0.843     | Low      | 38 | 0.01  | 0.54  | 0.11  | 0.13 | 0.05   | 0.01  | 0.14  |
|                           | Moderate | 37 | 0.00  | 0.54  | 0.10  | 0.12 | 0.05   | 0.01  | 0.10  |
|                           | High     | 38 | 0.00  | 0.40  | 0.09  | 0.11 | 0.05   | 0.01  | 0.10  |
| CDVA<br>P-Value=0.714     | Low      | 38 | 0.80  | 1.20  | 1.03  | 0.10 | 1.00   | 0.98  | 1.10  |
|                           | Moderate | 38 | 0.90  | 1.25  | 1.06  | 0.11 | 1.00   | 0.98  | 1.15  |
|                           | High     | 38 | 0.86  | 1.32  | 1.05  | 0.12 | 1.00   | 0.96  | 1.15  |
| ORA<br>P-Value<0.001      | Low      | 38 | 0.07  | 0.49  | 0.30  | 0.12 | 0.32   | 0.21  | 0.40  |
|                           | Moderate | 38 | 0.50  | 1.24  | 0.84  | 0.21 | 0.84   | 0.67  | 1.02  |
|                           | High     | 38 | 1.25  | 2.00  | 1.49  | 0.21 | 1.45   | 1.31  | 1.61  |
| ORA MRC<br>P-Value<0.001  | Low      | 38 | 0.08  | 0.66  | 0.31  | 0.15 | 0.29   | 0.21  | 0.40  |
|                           | Moderate | 38 | 0.30  | 1.65  | 0.88  | 0.35 | 0.81   | 0.61  | 1.13  |
|                           | High     | 38 | 0.61  | 2.60  | 1.54  | 0.43 | 1.56   | 1.29  | 1.80  |
| <b>Postoperative</b>      |          |    |       |       |       |      |        |       |       |
| K Mean<br>P-Value=0.603   | Low      | 38 | 36.00 | 44.00 | 40.64 | 2.25 | 40.95  | 39.02 | 42.42 |
|                           | Moderate | 38 | 36.80 | 44.70 | 40.44 | 2.08 | 40.65  | 39.05 | 42.08 |
|                           | High     | 38 | 36.10 | 45.60 | 40.95 | 2.10 | 40.90  | 39.90 | 42.08 |
| K Cyl<br>P-Value<0.001    | Low      | 38 | -1.30 | 0.00  | -0.57 | 0.30 | -0.60  | -0.70 | -0.40 |
|                           | Moderate | 38 | -1.80 | -0.20 | -0.91 | 0.42 | -0.90  | -1.25 | -0.50 |
|                           | High     | 38 | -6.10 | -0.40 | -1.48 | 0.91 | -1.40  | -1.70 | -1.00 |
| Sphere<br>P-Value=0.309   | Low      | 38 | -0.50 | 1.50  | 0.12  | 0.41 | 0.12   | -0.19 | 0.25  |
|                           | Moderate | 38 | -1.00 | 2.25  | 0.20  | 0.55 | 0.00   | 0.00  | 0.44  |
|                           | High     | 38 | -0.75 | 1.25  | 0.29  | 0.51 | 0.25   | 0.00  | 0.50  |
| Cylinder<br>P-Value=0.002 | Low      | 38 | -1.00 | 0.00  | -0.24 | 0.28 | -0.25  | -0.25 | 0.00  |
|                           | Moderate | 38 | -1.25 | 0.00  | -0.31 | 0.36 | -0.25  | -0.50 | 0.00  |
|                           | High     | 38 | -1.25 | 0.00  | -0.50 | 0.35 | -0.50  | -0.75 | -0.25 |
| SE<br>P-Value=0.934       | Low      | 38 | -0.62 | 1.00  | 0.01  | 0.36 | 0.00   | -0.25 | 0.25  |
|                           | Moderate | 38 | -1.12 | 1.62  | 0.04  | 0.45 | 0.00   | -0.12 | 0.25  |
|                           | High     | 38 | -0.75 | 1.00  | 0.04  | 0.43 | -0.06  | -0.25 | 0.22  |
| UDVA<br>P-Value=0.948     | Low      | 38 | 0.00  | 1.32  | 1.01  | 0.22 | 1.00   | 0.96  | 1.15  |
|                           | Moderate | 38 | 0.30  | 1.46  | 1.01  | 0.20 | 1.00   | 0.96  | 1.15  |
|                           | High     | 38 | 0.00  | 1.32  | 1.02  | 0.24 | 1.02   | 0.94  | 1.15  |
| CDVA<br>P-Value=0.353     | Low      | 38 | 0.88  | 1.32  | 1.08  | 0.11 | 1.05   | 1.00  | 1.20  |
|                           | Moderate | 38 | 0.70  | 1.32  | 1.09  | 0.14 | 1.05   | 1.00  | 1.25  |
|                           | High     | 38 | 0.00  | 1.46  | 1.10  | 0.23 | 1.15   | 1.00  | 1.25  |
| ORA<br>P-Value<0.001      | Low      | 38 | 0.00  | 0.98  | 0.54  | 0.27 | 0.57   | 0.36  | 0.80  |
|                           | Moderate | 38 | 0.16  | 1.57  | 0.74  | 0.34 | 0.71   | 0.50  | 0.98  |
|                           | High     | 38 | 0.15  | 5.94  | 1.13  | 0.92 | 0.96   | 0.69  | 1.28  |
| EI<br>P-Value=0.700       | Low      | 38 | 0.00  | 1.30  | 0.99  | 0.22 | 1.00   | 0.91  | 1.09  |
|                           | Moderate | 38 | 0.30  | 1.17  | 0.96  | 0.16 | 1.00   | 0.92  | 1.04  |
|                           | High     | 38 | 0.00  | 1.38  | 0.99  | 0.23 | 0.98   | 0.90  | 1.12  |
| SI<br>P-Value=0.270       | Low      | 38 | 0.83  | 1.33  | 1.06  | 0.11 | 1.01   | 1.00  | 1.10  |
|                           | Moderate | 38 | 0.70  | 1.32  | 1.03  | 0.09 | 1.02   | 1.00  | 1.09  |
|                           | High     | 38 | 0.00  | 1.42  | 1.06  | 0.21 | 1.09   | 1.00  | 1.15  |

**Supplementary Data 4: Refractive & visual acuity outcome of stage 4 + preoperative refractive & visual acuity data**

**Stage 4: Grouped by ORA magnitude, matched for MRC & then subdivided by CA magnitude // group A: CA <0,75D (low CA) / group B: CA ≥ 0,75D**

**Table 7: Stage 4**

| Variable             | High ORA Low CA |       |       |       |      |        |       |       | High ORA High CA |       |       |       |      |        |       |       | P-Value |
|----------------------|-----------------|-------|-------|-------|------|--------|-------|-------|------------------|-------|-------|-------|------|--------|-------|-------|---------|
|                      | N               | Min   | Max   | Mean  | SD   | Median | Q25   | Q75   | N                | Min   | Max   | Mean  | SD   | Median | Q25   | Q75   |         |
| <b>Preoperative</b>  |                 |       |       |       |      |        |       |       |                  |       |       |       |      |        |       |       |         |
| K Mean               | 15              | 40.70 | 44.70 | 43.30 | 1.05 | 43.30  | 42.75 | 44.10 | 23               | 41.80 | 49.30 | 44.49 | 1.85 | 44.40  | 42.90 | 45.90 | 0.016*  |
| K Cyl                | 15              | -0.70 | -0.40 | -0.59 | 0.11 | -0.60  | -0.70 | -0.50 | 23               | -3.60 | -0.80 | -1.82 | 0.74 | -1.90  | -2.25 | -1.25 | <0.001† |
| Sphere               | 15              | -7.25 | -1.00 | -2.63 | 1.79 | -1.75  | -3.25 | -1.38 | 23               | -8.00 | -0.50 | -3.64 | 1.93 | -3.75  | -4.88 | -2.00 | 0.068†  |
| Cylinder             | 15              | -1.75 | -0.75 | -1.03 | 0.28 | -1.00  | -1.00 | -0.88 | 23               | -2.25 | -0.75 | -1.07 | 0.41 | -1.00  | -1.38 | -0.75 | 0.659†  |
| SE                   | 15              | -8.00 | -1.38 | -3.15 | 1.83 | -2.25  | -3.75 | -2.00 | 23               | -8.38 | -1.25 | -4.17 | 1.86 | -4.25  | -5.31 | -2.56 | 0.056†  |
| UDVA                 | 15              | 0.01  | 0.34  | 0.12  | 0.10 | 0.10   | 0.04  | 0.20  | 23               | 0.00  | 0.40  | 0.08  | 0.11 | 0.03   | 0.01  | 0.10  | 0.080†  |
| CDVA                 | 15              | 0.86  | 1.32  | 1.11  | 0.13 | 1.10   | 1.00  | 1.17  | 23               | 0.88  | 1.20  | 1.00  | 0.10 | 0.98   | 0.95  | 1.08  | 0.014*  |
| ORA                  | 15              | 1.26  | 1.81  | 1.46  | 0.17 | 1.45   | 1.29  | 1.56  | 23               | 1.25  | 2.00  | 1.52  | 0.23 | 1.45   | 1.35  | 1.67  | 0.575†  |
| ORA MRC              | 15              | 0.74  | 1.93  | 1.48  | 0.28 | 1.53   | 1.42  | 1.65  | 23               | 0.61  | 2.60  | 1.59  | 0.51 | 1.68   | 1.22  | 1.91  | 0.388*  |
| <b>Postoperative</b> |                 |       |       |       |      |        |       |       |                  |       |       |       |      |        |       |       |         |
| K Mean               | 15              | 36.10 | 43.40 | 40.65 | 1.95 | 41.20  | 40.15 | 41.70 | 23               | 37.00 | 45.60 | 41.14 | 2.21 | 40.50  | 40.00 | 42.30 | 0.481*  |
| K Cyl                | 15              | -1.80 | -0.80 | -1.25 | 0.34 | -1.20  | -1.55 | -0.95 | 23               | -6.10 | -0.40 | -1.63 | 1.13 | -1.40  | -1.80 | -1.00 | 0.219†  |
| Sphere               | 15              | -0.50 | 1.25  | 0.27  | 0.48 | 0.25   | 0.00  | 0.50  | 23               | -0.75 | 1.25  | 0.30  | 0.54 | 0.25   | -0.12 | 0.50  | 0.823*  |
| Cylinder             | 15              | -1.25 | 0.00  | -0.50 | 0.35 | -0.50  | -0.75 | -0.25 | 23               | -1.25 | 0.00  | -0.50 | 0.36 | -0.50  | -0.75 | -0.25 | 1.000*  |
| SE                   | 15              | -0.50 | 0.75  | 0.02  | 0.37 | 0.00   | -0.12 | 0.12  | 23               | -0.75 | 1.00  | 0.05  | 0.48 | -0.12  | -0.25 | 0.25  | 0.787*  |
| UDVA                 | 15              | 0.84  | 1.32  | 1.12  | 0.17 | 1.15   | 0.95  | 1.25  | 23               | 0.00  | 1.32  | 0.96  | 0.26 | 0.98   | 0.92  | 1.10  | 0.068†  |
| CDVA                 | 15              | 1.00  | 1.32  | 1.19  | 0.10 | 1.25   | 1.15  | 1.25  | 23               | 0.00  | 1.46  | 1.04  | 0.27 | 1.00   | 0.99  | 1.20  | 0.009†  |
| ORA                  | 15              | 0.15  | 1.55  | 0.90  | 0.34 | 0.95   | 0.68  | 1.03  | 23               | 0.27  | 5.94  | 1.27  | 1.14 | 1.04   | 0.69  | 1.48  | 0.391†  |
| EI                   | 15              | 0.76  | 1.26  | 1.02  | 0.17 | 0.96   | 0.87  | 1.17  | 23               | 0.00  | 1.38  | 0.97  | 0.27 | 1.00   | 0.91  | 1.09  | 0.858†  |
| SI                   | 15              | 0.91  | 1.25  | 1.08  | 0.11 | 1.09   | 0.99  | 1.17  | 23               | 0.00  | 1.42  | 1.04  | 0.26 | 1.08   | 1.00  | 1.13  | 0.643†  |

\* Independent T-Test.

† Mann-Whitney Test.

**Supplementary data 5: Preoperative side effects of Stage 1**

Stage 1: grouped by ORA / MRC // **group A**: ORA / MRC = 1 or less (= low ORA) / **group B**: ORA / MRC = 1.1 and more (= high ORA)

|                                                                      | N   | Min | Max | Mean | SD   | Median | Q25 | Q75  | P-Value |
|----------------------------------------------------------------------|-----|-----|-----|------|------|--------|-----|------|---------|
| <b>Starburst**</b>                                                   |     |     |     |      |      |        |     |      |         |
| Group A                                                              | 180 | 1   | 5   | 1,05 | 0,43 | 1      | 1   | 1,00 | 0,531   |
| Group B                                                              | 108 | 1   | 4   | 1,08 | 0,50 | 1      | 1   | 1,00 |         |
| <b>Glare**</b>                                                       |     |     |     |      |      |        |     |      |         |
| Group A                                                              | 180 | 1   | 7   | 1,46 | 1,16 | 1      | 1   | 2,00 | 0,680   |
| Group B                                                              | 108 | 1   | 5   | 1,43 | 1,01 | 1      | 1   | 1,00 |         |
| <b>Halo**</b>                                                        |     |     |     |      |      |        |     |      |         |
| Group A                                                              | 180 | 1   | 3   | 1,03 | 0,26 | 1      | 1   | 1,00 | 0,130   |
| Group B                                                              | 108 | 1   | 4   | 1,14 | 0,63 | 1      | 1   | 1,00 |         |
| <b>Double vision &amp; ghost images**</b>                            |     |     |     |      |      |        |     |      |         |
| Group A                                                              | 180 | 1   | 3   | 1,02 | 0,21 | 1      | 1   | 1,00 | 0,144   |
| Group B                                                              | 108 | 1   | 2   | 1,04 | 0,19 | 1      | 1   | 1,00 |         |
| **Scale of symptoms: low symptoms (1) to strong symptoms (7)         |     |     |     |      |      |        |     |      |         |
| ***Scale of satisfaction: very satisfied (1) to very unsatisfied (5) |     |     |     |      |      |        |     |      |         |

**Supplementary data 6: Preoperative side effects of Stage 2**

Stage 2: grouped by ORA / MRC, matched for MRC / **group A:** ORA / MRC = 1 or less (= low ORA) / **group B:** ORA / MRC = 1.1 and more (= high ORA)

|                                           | N  | Min | Max | Mean | SD   | Median | Q25 | Q75  | P-Value |
|-------------------------------------------|----|-----|-----|------|------|--------|-----|------|---------|
| <b>Starburst**</b>                        |    |     |     |      |      |        |     |      |         |
| Group A                                   | 38 | 1   | 1   | 1,00 | 0,00 | 1      | 1   | 1,00 | NaN     |
| Group B                                   | 36 | 1   | 1   | 1,00 | 0,00 | 1      | 1   | 1,00 |         |
| <b>Glare**</b>                            |    |     |     |      |      |        |     |      |         |
| Group A                                   | 38 | 1   | 5   | 1,32 | 0,96 | 1      | 1   | 1,00 | 1,000   |
| Group B                                   | 36 | 1   | 4   | 1,25 | 0,77 | 1      | 1   | 1,00 |         |
| <b>Halo**</b>                             |    |     |     |      |      |        |     |      |         |
| Group A                                   | 38 | 1   | 3   | 1,05 | 0,32 | 1      | 1   | 1,00 | 0,969   |
| Group B                                   | 36 | 1   | 4   | 1,08 | 0,50 | 1      | 1   | 1,00 |         |
| <b>Double vision &amp; ghost images**</b> |    |     |     |      |      |        |     |      |         |
| Group A                                   | 38 | 1   | 1   | 1,00 | 0,00 | 1      | 1   | 1,00 | 0,317   |
| Group B                                   | 36 | 1   | 2   | 1,03 | 0,17 | 1      | 1   | 1,00 |         |

\*\*Scale of symptoms: low symptoms (1) to strong symptoms (7)  
\*\*\*Scale of satisfaction: very satisfied (1) to very unsatisfied (5)

**Supplementary Data 7: Preoperative side effects of Stage 3**

Stage 3: Grouped by ORA magnitude, matched for MRC // **group A:** ORA = 0.49 and less (= low ORA) / **group B:** ORA = 0.50 to 1.24 (= medium ORA) / **group C:** ORA = 1.25 and more (= high ORA)

|                                           | N  | Min | Max | Mean | SD   | Median | Q25 | Q75  | P-Value |
|-------------------------------------------|----|-----|-----|------|------|--------|-----|------|---------|
| <b>Starburst**</b>                        |    |     |     |      |      |        |     |      |         |
| Group A                                   | 12 | 1   | 1   | 1,00 | 0,00 | 1      | 1   | 1,00 | 0,454   |
| Group C                                   | 18 | 1   | 4   | 1,17 | 0,71 | 1      | 1   | 1,00 |         |
| <b>Glare**</b>                            |    |     |     |      |      |        |     |      |         |
| Group A                                   | 12 | 1   | 5   | 1,83 | 1,40 | 1      | 1   | 1,00 | 0,980   |
| Group C                                   | 18 | 1   | 4   | 1,89 | 1,37 | 1      | 1   | 3,50 |         |
| <b>Halo**</b>                             |    |     |     |      |      |        |     |      |         |
| Group A                                   | 12 | 1   | 1   | 1,00 | 0,00 | 1      | 1   | 1,00 | 0,454   |
| Group C                                   | 18 | 1   | 4   | 1,17 | 0,71 | 1      | 1   | 1,00 |         |
| <b>Double vision &amp; ghost images**</b> |    |     |     |      |      |        |     |      |         |
| Group A                                   | 12 | 1   | 1   | 1,00 | 0,00 | 1      | 1   | 1,00 | 0,454   |
| Group C                                   | 18 | 1   | 2   | 1,06 | 0,24 | 1      | 1   | 1,00 |         |

\*\*Scale of symptoms: low symptoms (1) to strong symptoms (7)

\*\*\*Scale of satisfaction: very satisfied (1) to very unsatisfied (5)

**Supplementary data 8: Preoperative side effects of Stage 4**

Stage 4: Grouped by ORA magnitude, matched for MRC &amp; then subdivided by CA magnitude

// **group A:** CA < 0,75D (low CA) / **group B:** CA ≥ 0,75D

|                                           | N  | Min | Max | Mean | SD   | Median | Q25 | Q75  | P-Value |
|-------------------------------------------|----|-----|-----|------|------|--------|-----|------|---------|
| <b>Starburst**</b>                        |    |     |     |      |      |        |     |      |         |
| Group A                                   | 8  | 1   | 1   | 1,00 | 0,00 | 1      | 1   | 1,00 | 0,434   |
| Group B                                   | 10 | 1   | 4   | 1,30 | 0,95 | 1      | 1   | 1,00 |         |
| <b>Glare**</b>                            |    |     |     |      |      |        |     |      |         |
| Group A                                   | 8  | 1   | 2   | 1,12 | 0,35 | 1      | 1   | 2,50 | 0,068   |
| Group B                                   | 10 | 1   | 4   | 2,50 | 1,58 | 2,5    | 1   | 4,00 |         |
| <b>Halo**</b>                             |    |     |     |      |      |        |     |      |         |
| Group A                                   | 8  | 1   | 1   | 1,00 | 0,00 | 1      | 1   | 1,00 | 0,434   |
| Group B                                   | 10 | 1   | 4   | 1,30 | 0,95 | 1      | 1   | 1,00 |         |
| <b>Double vision &amp; ghost images**</b> |    |     |     |      |      |        |     |      |         |
| Group A                                   | 8  | 1   | 1   | 1,00 | 0,00 | 1      | 1   | 1,00 | 0,434   |
| Group B                                   | 10 | 1   | 2   | 1,10 | 0,32 | 1      | 1   | 1,00 |         |

\*\*Scale of symptoms: low symptoms (1) to strong symptoms (7)  
\*\*\*Scale of satisfaction: very satisfied (1) to very unsatisfied (5)  
CA = corneal astigmatism



**Supplementary data 9: Postoperative side effects of Stage 3**

Stage 3: Grouped by ORA magnitude, matched for MRC // **group A:** ORA = 0.49 and less (= low ORA) / **group B:** ORA = 0.50 to 1.24 (= medium ORA) / **group C:** ORA = 1.25 and more (= high ORA)

|                                           | N  | Min | Max | Mean | SD   | Median | Q25 | Q75  | P-Value |
|-------------------------------------------|----|-----|-----|------|------|--------|-----|------|---------|
| <b>Starburst**</b>                        |    |     |     |      |      |        |     |      |         |
| Group A                                   | 12 | 1   | 2   | 1,08 | 0,29 | 1      | 1   | 1,00 | 0,247   |
| Group C                                   | 18 | 1   | 1   | 1,00 | 0,00 | 1      | 1   | 1,00 |         |
| <b>Glare**</b>                            |    |     |     |      |      |        |     |      |         |
| Group A                                   | 12 | 1   | 4   | 1,67 | 0,98 | 1      | 1   | 2,00 | 0,595   |
| Group C                                   | 18 | 1   | 4   | 1,61 | 0,14 | 1      | 1   | 1,75 |         |
| <b>Halo**</b>                             |    |     |     |      |      |        |     |      |         |
| Group A                                   | 12 | 1   | 1   | 1,00 | 0,00 | 1      | 1   | 1,00 | NaN     |
| Group C                                   | 18 | 1   | 4   | 1,00 | 0,00 | 1      | 1   | 1,00 |         |
| <b>Double vision &amp; ghost images**</b> |    |     |     |      |      |        |     |      |         |
| Group A                                   | 12 | 1   | 4   | 1,25 | 0,87 | 1      | 1   | 1,00 | 0,0247  |
| Group C                                   | 18 | 1   | 1   | 1,00 | 0,00 | 1      | 1   | 1,00 |         |
| <b>Dry Eyes**</b>                         |    |     |     |      |      |        |     |      |         |
| Group A                                   | 12 | 1   | 4   | 1,33 | 0,89 | 1      | 1   | 1,00 | 0,218   |
| Group C                                   | 18 | 1   | 5   | 1,78 | 1,17 | 1      | 1   | 2,00 |         |
| <b>Satisfaction with vision***</b>        |    |     |     |      |      |        |     |      |         |
| Group A                                   | 12 | 1   | 2   | 1,17 | 0,39 | 1      | 1   | 1,00 | 0,737   |
| Group C                                   | 18 | 1   | 4   | 1,22 | 0,43 | 1      | 1   | 1,00 |         |

\*\*Scale of symptoms: low symptoms (1) to strong symptoms (7)

\*\*\*Scale of satisfaction: very satisfied (1) to very unsatisfied (5)

**Supplementary Data 10: Postoperative side effects of Stage 4**Stage 4: Grouped by ORA magnitude, matched for MRC & then subdivided by CA magnitude // **group A:** CA < 0,75D (low CA) / **group B:** CA ≥ 0,75D

|                                | N  | Min | Max | Mean | SD   | Median | Q25 | Q75  | P-Value |
|--------------------------------|----|-----|-----|------|------|--------|-----|------|---------|
| Starburst**                    |    |     |     |      |      |        |     |      |         |
| Group A                        | 8  | 1   | 1   | 1,00 | 0,00 | 1      | 1   | 1,00 | NaN     |
| Group B                        | 10 | 1   | 1   | 1,00 | 0,00 | 1      | 1   | 1,00 |         |
| Glare**                        |    |     |     |      |      |        |     |      |         |
| Group A                        | 8  | 1   | 4   | 1,88 | 1,36 | 1      | 1   | 2,50 | 0,429   |
| Group B                        | 10 | 1   | 4   | 1,40 | 0,97 | 1      | 1   | 1,75 |         |
| Halo**                         |    |     |     |      |      |        |     |      |         |
| Group A                        | 8  | 1   | 1   | 1,00 | 0,00 | 1      | 1   | 1,00 | NaN     |
| Group B                        | 10 | 1   | 1   | 1,00 | 0,00 | 1      | 1   | 1,00 |         |
| Double vision & ghost images** |    |     |     |      |      |        |     |      |         |
| Group A                        | 8  | 1   | 1   | 1,00 | 0,00 | 1      | 1   | 1,00 | NaN     |
| Group B                        | 10 | 1   | 1   | 1,00 | 0,00 | 1      | 1   | 1,00 |         |
| Dry Eyes**                     |    |     |     |      |      |        |     |      |         |
| Group A                        | 8  | 1   | 4   | 1,50 | 1,07 | 1      | 1   | 1,25 | 0,334   |
| Group B                        | 10 | 1   | 4   | 2,00 | 1,25 | 1,5    | 1   | 2,00 |         |
| Satisfaction with vision***    |    |     |     |      |      |        |     |      |         |
| Group A                        | 8  | 1   | 2   | 1,12 | 0,35 | 1      | 1   | 1,00 | 0,423   |
| Group B                        | 10 | 1   | 2   | 1,30 | 0,48 | 1      | 1   | 1,00 |         |

\*\*Scale of symptoms: low symptoms (1) to strong symptoms (7)  
\*\*\*Scale of satisfaction: very satisfied (1) to very unsatisfied (5)
